# Supplementary material
Source: PubMed Central journal article supplement (PMC4066910)

Supporting Information for:

Urinary phthalate metabolite associations with biomarkers of inflammation and oxidative stress across pregnancy in Puerto Rico.

Kelly K. Ferguson, David E. Cantonwine, Luis O. Rivera-González, Rita Loch-Caruso, Bhramar Mukherjee, Liza V. Anzalota Del Toro, Braulio Jiménez-Vélez, Antonia M. Calafat, Xiaoyun Ye, Akram N. Alshwabkeh, José F. Cordero, John D. Meeker

2 pages

1 Figure

Figure S1. Boxplots comparing oxidative stress biomarker distributions by study visit.

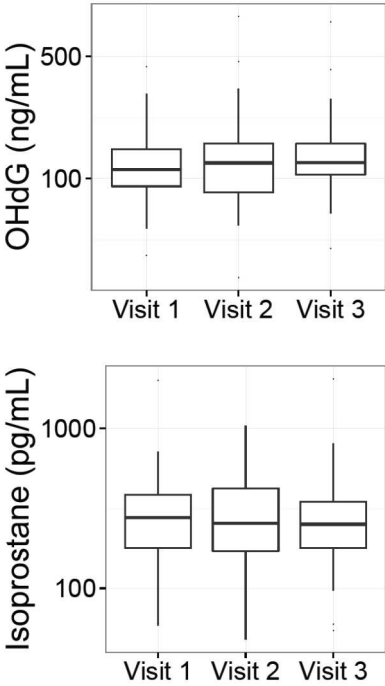

Supplement: es502076j_si_001.pdf [file es502076j_si_001.pdf]
